# Supplementary material for: Functional characterization of Ralstonia insidiosa, a bona fide resident at the maternal-fetal interface
Source: bioRxiv or medRxiv preprint supplement (doi:10.1101/721977), 2019-08-01
Supplement: Supplementary file [file media-1.pdf]

**Functional characterization of *Ralstonia insidiosa*, a bona fide resident at the maternal-fetal interface**

Lindsay A. Parnell<sup>1</sup>, Graham G. Willsey<sup>3</sup>, Chetanchandra S. Joshi<sup>1</sup>, Yin Yin<sup>1</sup>, Matthew J. Wargo<sup>3</sup>, Indira U. Mysorekar<sup>1,2 \*</sup>

## **Supplemental figures and tables**

### **Supplementary tables**

**Table S1. Overview of the 16S rRNA fluorescent in situ hybridization probes applied to basal plate specimens in this study.**

**Table S2. Overview of the isolates used.**

**Table S3. Primer pairs targeting yellow-fluorescent protein.**

### **Supplementary figures**

**Figure S1. Evaluation of probe functionality by whole bacterial cell fluorescent in situ hybridization using a *R. insidiosus* WT strain (MJ602).**

**Figure S2. Evaluation of FISH probe functionality and yfp-expression using GGW102.**

**Figure S3. Growth profiles *R. insidiosus* strains MJ602 and GGW102 in monocultures.**

**Figure S4. Placentas and fetuses from mice challenged with *R. insidiosus* do not exhibit significant anatomical anomalies.**

| Probe name          | Sequence 5' → 3'              | Label (5' end) | Specificity                                                    | Source                            |
|---------------------|-------------------------------|----------------|----------------------------------------------------------------|-----------------------------------|
| EUB338              | GCTGCCTCCCGTAGGAGT            | CY3            | Conserved domain of the eubacterial 16S rRNA gene              | Amann et. al 1990 <sup>67</sup>   |
| NON-EUB338          | ACTCCTACGGGAGGCAGC            | CY3            | Nonsense control complementary to EUB338                       | Wallner et. al 1993 <sup>68</sup> |
| <i>R. insidiosa</i> | TTAGTAAGTGCGATTTCTTT<br>CCGGA | FITC           | Species-specific sequence of <i>R. insidiosa</i> 16S rRNA gene | This study                        |

Table S1. **Overview of the 16S rRNA fluorescent in situ hybridization probes applied to basal plate specimens in this study.**

| <b><i>R. insidiosa</i><br/>isolate</b> | <b>Source</b>                                                            | <b>Growth<br/>conditions</b>             |
|----------------------------------------|--------------------------------------------------------------------------|------------------------------------------|
| MJ602 (WT)                             | Johnson Space Center as <i>R. insidiosa</i><br>130770013-1 <sup>73</sup> | Static; 32 °C<br>Reasoner's 2B<br>Medium |
| GGW102 (YFP<br>strain)                 | attTn7 integration of <i>yfp</i> into strain MJ602                       | Static; 32 °C<br>Reasoner's 2B<br>Medium |

Table S2. **Overview of the isolates used.**

| Primer Name | Forward (5'-3')      | Reverse Forward (5'-3') | Product Length (bp) |
|-------------|----------------------|-------------------------|---------------------|
| YFP 1       | GCTACCCCGACCATGAAG   | AAGAAGATGGTGCGCTCCTG    | 82                  |
| YFP 2       | ACGTAAACGGCCACAAGTTC | CTTCATGTGGTCGGGGTAGC    | 176                 |
| YFP 3       | AGCAAAGACCCCAACGAGAA | TCGTCCATGCCGAGAGTGAT    | 83                  |
| YFP 4       | GAACCGCATCGAGCTGAA   | TGCTTGTCGGCCATGATATAG   | 111                 |

Table S3. **Primer pairs targeting yellow-fluorescent protein.**

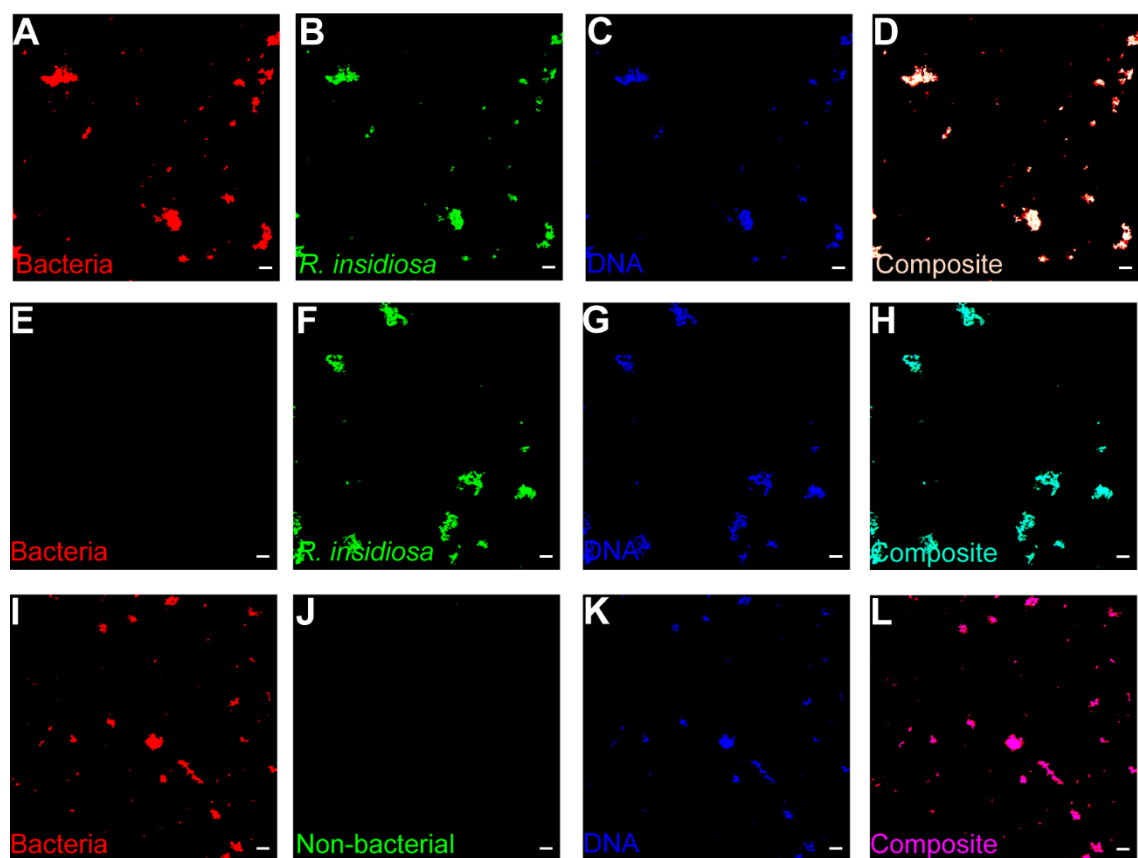

Figure S1. **Evaluation of probe functionality by whole bacterial cell fluorescent in situ hybridization using a *R. insidiosa* WT strain (MJ602).** EUB338-CY3 was used as a universal bacterial probe (bacteria-red), *R. insidiosa*-FITC was used as a species-specific probe (*R. insidiosa*-green), NON-EU338-FITC represents the complement to the universal eubacterial probe and was used as a negative control probe (non-bacteria-green), and DAPI was used for host nuclear and bacterial DNA staining (DNA-blue). Whole bacterial cells were simultaneously hybridized with (A-D) bacterial probe, *R. insidiosa* probe (*R. insidiosa*-green) and DAPI (DNA-blue); (E-H) *R. insidiosa* and DAPI; or with the bacterial and non-bacterial probe. Fluorescent images were acquired separately using three filter sets (CY3, FITC, DAPI) and are displayed as a final image (composite) (Magnification 40x oil, scale bar: 20  $\mu$ m).

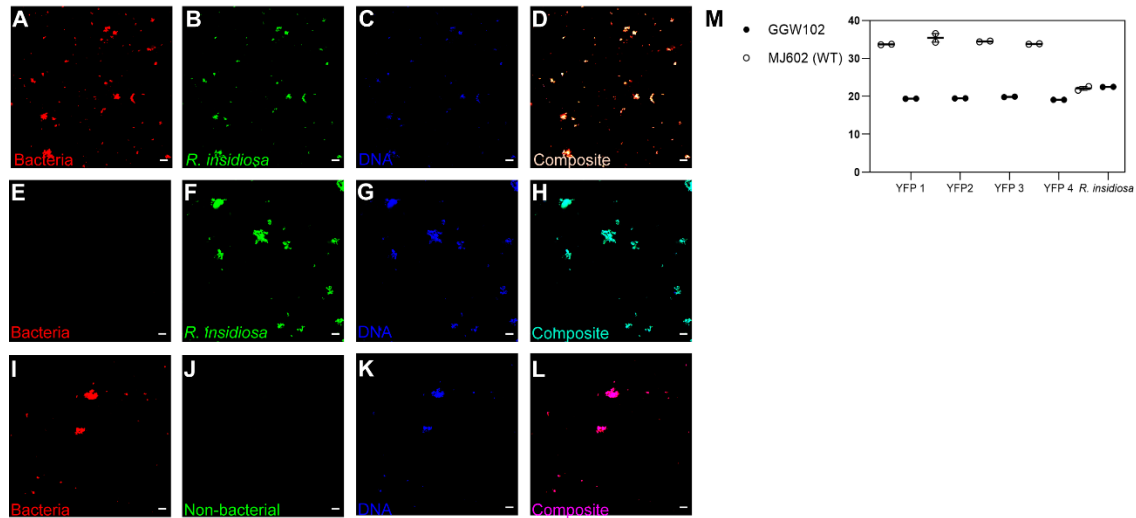

Figure S2. **Evaluation of FISH probe functionality and yfp-expression using GGW102.** Whole bacterial cells were simultaneously hybridized with the universal bacterial probe (bacteria-red), *R. insidiosa* probe (*R. insidiosa*-green) and DAPI (DNA-blue); (E-H) the *R. insidiosa* probe and DAPI; or with the bacterial probe (red) and non-bacterial probe (green). Fluorescent images were acquired separately using three filter sets (CY3, FITC, DAPI) are displayed as a final image (composite) (Magnification 40x oil, scale bar: 20  $\mu$ m). (M) YFP primers (YFP 1-4) were used to verify the presence of YFP. YFP is expressed in GGW102, but not in MJ602. The *R. insidiosa*-specific product is amplified in both isolates. Cq values are reported.

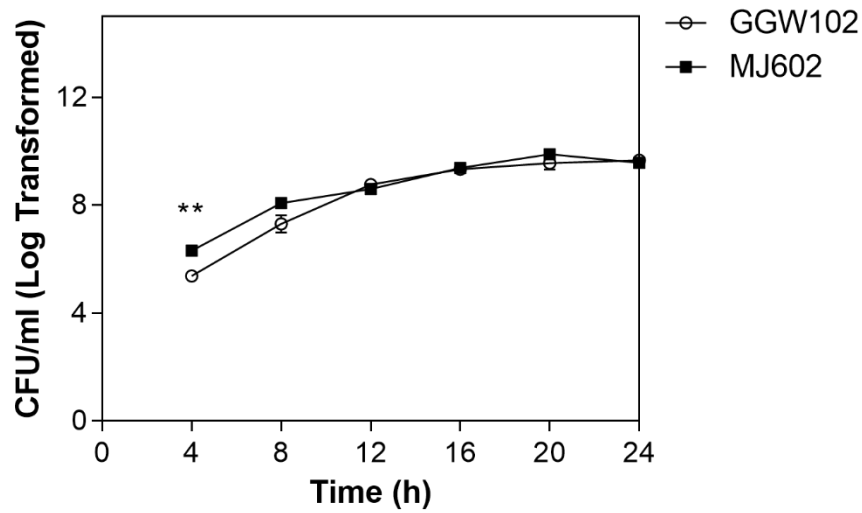

Figure S3. **Growth profiles *R. insidiosa* strains MJ602 and GGW102 in monocultures.** The data is the average CFUs over the course of 24 hours for MJ602 and GGW102 (n = 6 colonies each). Single colonies were inoculated in 20 mLs of R2B. Although there is a significant difference in the log CFUs in MJ602 compared to GGW102 at 4 h ( $p = 0.00220$ ), there is no significant difference between the growth of isolates at 8h and onward (8h,  $p = 0.180$ , 12h,  $p = > 0.999$ ; 16h,  $p = > 0.999$ , 20h,  $p = 0.240$ , 24h,  $p = 0.818$ ) suggesting that they can be used interchangeably for replication analysis ex vivo, in vitro, and in vivo studies. P-values were calculated using the two-tailed Mann-Whitney U test at each time point. \*\* indicates a  $p < 0.005$ .

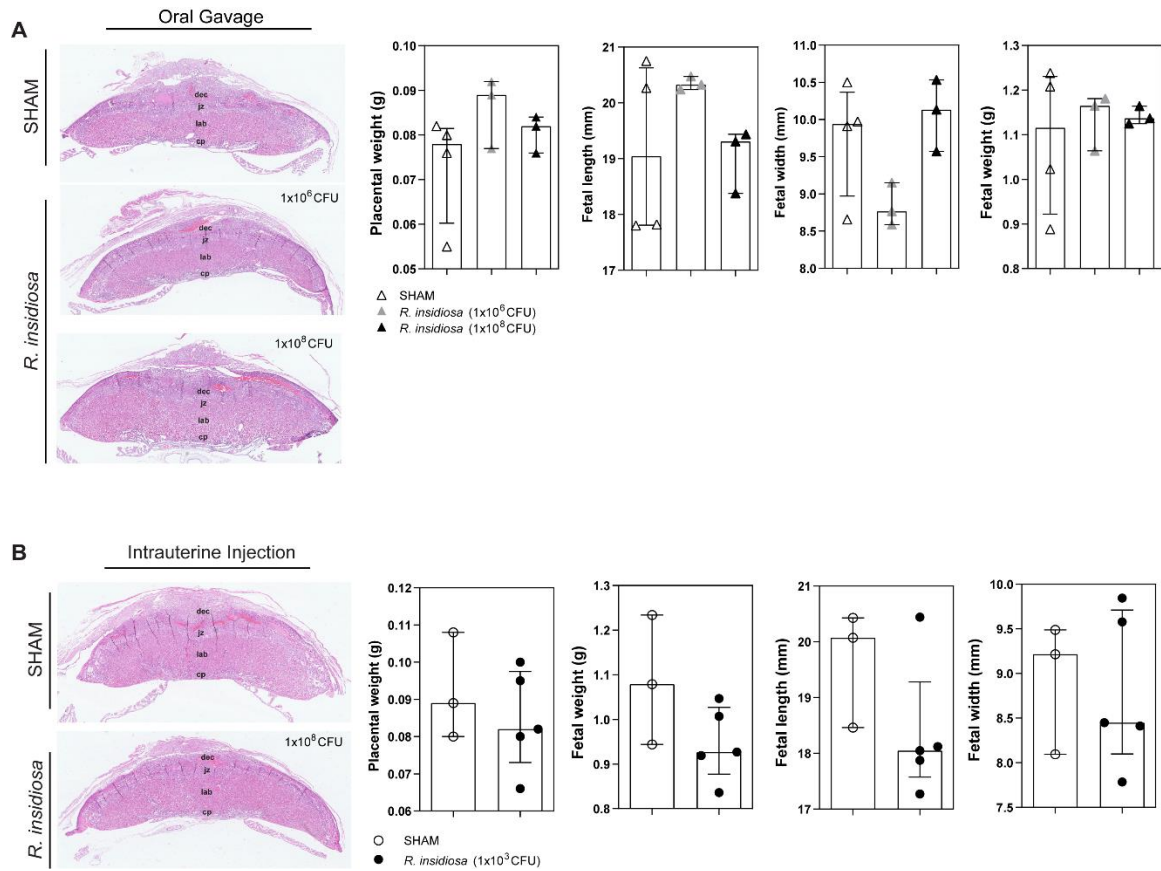

**Figure S4. Placentas and fetuses from mice challenged with *R. insidiosus* do not exhibit significant anatomical anomalies.** (A) Representative hematoxylin and eosin staining of mouse placentas (gd 18.5) derived from SHAM (n= 4) or *R. insidiosus* challenged dams following oral gavage of 1x10<sup>6</sup> (n=3) and 1x10<sup>8</sup> (n=3) CFUs at gd 15.5. Fetoplacental units of *R. insidiosus*-challenged dams compared to SHAM controls exhibit no differences in the median placental weight (n=10, Kruskal-Wallis statistic = 2.92; p = 0.260), fetal length by oral gavage (n=10, Kruskal-Wallis statistic = 2.38; p = 0.326), fetal width (n=10, Kruskal-Wallis statistic = 4.27; p = 0.123), or fetal weight (n=10, Kruskal-Wallis statistic = 0.164; p = 0.941). (B) Representative hematoxylin and eosin staining mouse placentas (gd 18.5) from (H) SHAM or (I) *R. insidiosus*-challenged dams following intrauterine injection of 1x10<sup>3</sup> CFUs at gd 15.5. Fetoplacental units of *R. insidiosus*-challenged dams compared to SHAM controls exhibit no differences in the median placental weight (Mann-Whitney U = 5.50; p = 0.643), fetal length by oral gavage (Mann-Whitney U=3; p =0.250), fetal width (Mann-Whitney U=7; p = >0.999), or fetal weight (Mann-Whitney U = 2; p = 0.143). P-values were calculated using the two-tailed Mann-Whitney U test.
